# Supplementary material for: Soluble and highly ionically conducting interpolyelectrolyte complexes prepared via chemical template polymerization of aniline in the presence of perfluorinated polysulfonic acid
Source: Royal Society of Chemistry journal article supplement (doi:10.1039/c4ra11217b), 2014-01-01
Supplement: c4ra11217b1.pdf [file c4ra11217b1.pdf]

## Supporting Information

Soluble and highly ionically conducting interpolyelectrolyte complexes prepared via chemical template polymerization of aniline in the presence of perfluorinated polysulfonic acid

*Zhanna A. Boeva,\* and Vladimir Sergeyev*

M.V. Lomonosov Moscow State University, Polymer Division, Chemistry Department, Leninskie gory 1, build. 3, Moscow, Russian Federation

Scanning Electron Microscopy (SEM) of the surface of the selected films, MF-4SC, PANI-MF-4SC 1.5, and PANI-MF-4SC 0.1 (Figure 1) was performed by using JEOL JSM-6390LA instrument, JEOL Ltd. The films were placed onto Cu/Zn microscopy table of the instrument and evacuated in the microscope chamber ( $P = 10^{-4}$  Pa). The microscopy imaging was carried out with 0.5-30 kV of accelerating voltage and 8-25 mm of working distance.

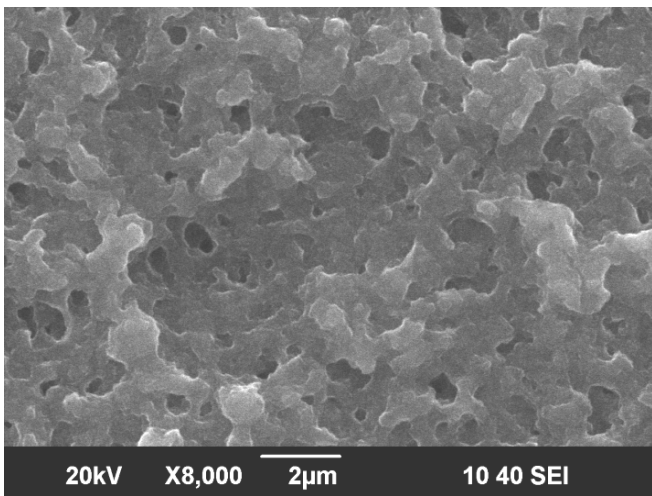

a)

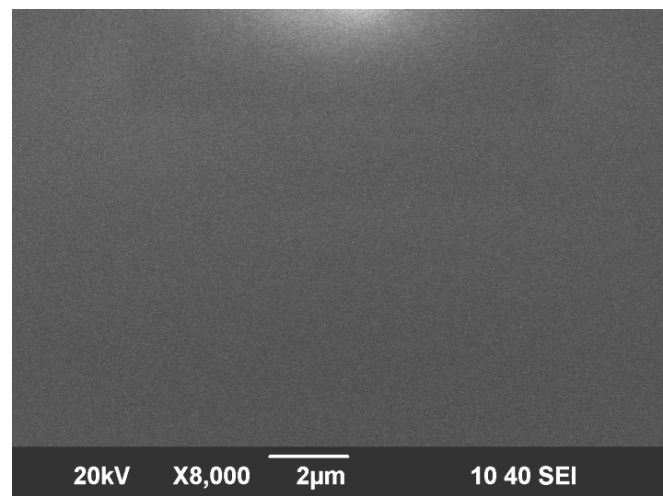

b)

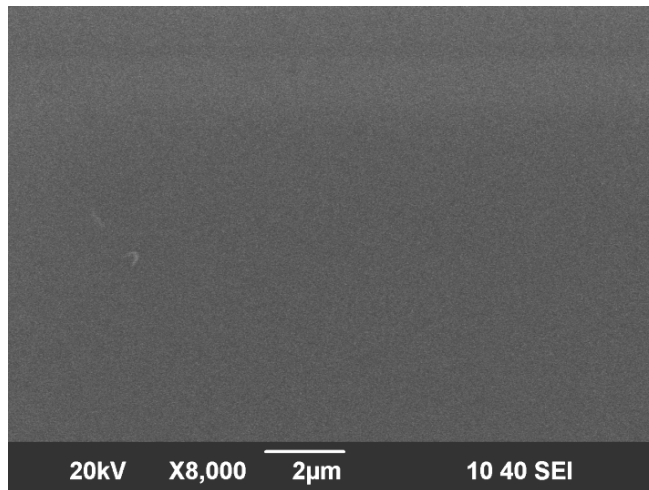

c)

Fig. 1. SEM images of PANI-MF-4SC  $Z = 1.5$  (a), PANI-MF-4SC  $Z = 0.1$  (b), and MF-4SC (c).

The SEM images show that MF-4SC and IPEC composite membrane PANI-MF-4SC with  $Z = 0.1$  have uniform dense structure while the film of PANI-MF-4SC with  $Z = 1.5$  has floccules on the surface.
